# Supplementary material for: Hard Selective Sweep and Ectopic Gene Conversion in a Gene Cluster Affording Environmental Adaptation
Source: PubMed Central journal article supplement (PMC3749932; doi:10.1371/journal.pgen.1003707), 2013-08-22
Supplement: pgen.1003707.s008.pdf [file pgen.1003707.s008.pdf]

**Table S1.** Information on DNA amplicons and on the sequencing of cloned amplicons.

| Amplicon |                        | Composition              |                              | Target gene (position)                          | Annotation <sup>2</sup>                                     | Missing individuals <sup>3</sup> | Sequences of PCR primers used for amplification <sup>4</sup> |                          |
|----------|------------------------|--------------------------|------------------------------|-------------------------------------------------|-------------------------------------------------------------|----------------------------------|--------------------------------------------------------------|--------------------------|
| Name     | Size (bp) <sup>1</sup> | Coding (bp) <sup>1</sup> | Non-coding (bp) <sup>1</sup> |                                                 |                                                             |                                  | Forward                                                      | Reverse                  |
| S1       | 1593                   | 224                      | 1369                         | At2g18750 (5')                                  | Calmodulin-binding protein                                  | 7.1-7.3, 8.1, 9.1                | CAACATAACTCTGATGATGAACACG                                    | CTCGGCGAAGAATCGGTTCC     |
| S2       | 1451                   | 398                      | 1053                         | At2g19010 (3')                                  | GDSL-like Lipase/Acylhydrolase                              | -                                | GCACACCAAGATAATGAAGTCACAC                                    | GACTTGCTTAGCGGCTTCCTCG   |
| S3       | 1305                   | 540                      | 765                          | At2g19090 (5')                                  | Protein of unknown function                                 | -                                | CGAAAATAACATGAAAAGCGAGG                                      | CCAAACGAAGATGAAGTAGACGC  |
| S4       | 1885                   | 30                       | 1855                         | <i>HMA4-1p</i> <sup>5</sup> (5')                | Heavy Metal ATPase 4                                        | -                                | GACATTCCACTTTTGGGGTTTCC                                      | TTTCTCTTCTTTGTTTGTGACGCC |
| S5       | 1419                   | 1301                     | 118                          | <i>HMA4-1</i> <sup>5</sup> (3')                 | Heavy Metal ATPase 4                                        | -                                | GCGATGATGATGCTGTGGAC                                         | TCAAGCACTCACATGGTATGGTG  |
| S6       | 917                    | 30                       | 887                          | <i>HMA4-2p</i> <sup>5</sup> (5')                | Heavy Metal ATPase 4                                        | <sup>6</sup>                     | GCTAAAAACACCCGATTAAGAAG                                      | TTTCTCTTCTTTGTTTGTGACGCC |
| S7       | 1406                   | 1301                     | 105                          | <i>HMA4-2</i> <sup>5</sup> (3')                 | Heavy Metal ATPase 4                                        | <sup>6</sup>                     | GCGATGATGATGCTGTGGAC                                         | TCAAGCACTCACATGGTATGGTG  |
| S8       | 2477 <sup>7</sup>      | 1346                     | 1131                         | <i>HMA4-2</i> <sup>5</sup> (3')/<br>At2g19120-2 | Heavy Metal ATPase 4                                        | 8.1 <sup>6</sup>                 | GACACATCTTACCTGGAGAAG                                        | GCCAGATTATATGGTATATG     |
| S9       | 2245                   | 30                       | 2215                         | <i>HMA4-3p</i> <sup>5</sup> (5')                | Heavy Metal ATPase 4                                        | 3.2, 7.3 <sup>6</sup>            | TTAAAAGGGTATTGAAAAAGGAGC                                     | TTTCTCTTCTTTGTTTGTGACGCC |
| S10      | 1425                   | 1307                     | 118                          | <i>HMA4-3</i> <sup>5</sup> (3')                 | Heavy Metal ATPase 4                                        | <sup>6</sup>                     | GCGATGATGATGCTGTGGAC                                         | TCAAGCACTCACATGGTATGGTG  |
| S11      | 1326                   | 458                      | 868                          | At2g19150 (5')                                  | Pectin lyase-like protein                                   | 7.3, 8.1                         | TGAAAATTCAACAAATAGTGTACCG                                    | GCAGCCACCGCTGGTTTGG      |
| S12      | 2132                   | 311                      | 1821                         | At2g19160 (5')                                  | Core-2/I-branching beta-1,6-N-acetylglucosaminyltransferase | -                                | TAACATGCTTTCCTTGACGGG                                        | GAACCTTTTTTATAACACGAGGGG |
| S13      | 1694                   | 302                      | 1392                         | At2g19490 (5')                                  | recA DNA recombination protein                              | 6.2                              | GGTCAAGCAGGTGAGAGGCCA                                        | CCTCCTTGTTTTGTGCTTCTGC   |

<sup>1</sup>Sizes based on *A. halleri* BAC sequences (Genbank accession numbers: EU382073.1, EU382072.1) [8], and on *A. thaliana* genome sequence (Genbank accession numbers: AC005724 and AC005917) for amplicons S1 and S13. Note that primers designed for amplicons S5, S7 and S10 non-specifically cross-amplified sequences from all three of these target gene copies in *A. halleri*; assignment to copies was then done based on S8 and according to Materials and Methods.

<sup>2</sup>TAIR 10 (<http://www.arabidopsis.org>).

<sup>3</sup>No PCR products were obtained for the given individuals despite attempts using a range of alternative primer pairs and PCR conditions.

<sup>4</sup>Amplicons were sequenced after cloning, using vector-specific primers M13f (CGCCAGGGTTTCCAGTCACGAC) and M13r (TCACACAGGAAACAGCTATGAC). When necessary, sequencing was completed using additional gene-specific primers.

<sup>5</sup>All *HMA4* gene copies correspond to At2g19110. *p*: promoter region.

<sup>6</sup>There is only a single complete *HMA4* gene in the *A. lyrata* genome, which corresponds to *AhHMA4-1* (S4, S5). See also Figure S1.

<sup>7</sup>For S8, only the 3'-end of the amplicon encompassing 492 bp (209 bp coding and 283 bp non-coding<sup>1</sup>) was used as segment S8 in all analyses (see Figure S5A). The 5'-end of amplicon S8 (819 bp<sup>1</sup>) was designed to overlap with S7 and used to identify S7 sequences (see Materials and Methods; Figure S5A).

Red fonts: segments comprising repeated sequence stretches present in several, almost identical copies in the *HMA4* genomic region.
