# Supplementary material for: Hard Selective Sweep and Ectopic Gene Conversion in a Gene Cluster Affording Environmental Adaptation
Source: PubMed Central journal article supplement (PMC3749932; doi:10.1371/journal.pgen.1003707), 2013-08-22
Supplement: pgen.1003707.s009.pdf [file pgen.1003707.s009.pdf]

**Table S2.** Summary of statistics of nucleotide sequence diversity as shown in Figure 1.

| Alleles                                        | Statistics                                                 | Segment                  |        |        |        |                |                           |        |        |                           |                |                           |        |                          |
|------------------------------------------------|------------------------------------------------------------|--------------------------|--------|--------|--------|----------------|---------------------------|--------|--------|---------------------------|----------------|---------------------------|--------|--------------------------|
|                                                |                                                            | S1                       | S2     | S3     | S4     | S5             | S6                        | S7     | S8     | S9                        | S10            | S11                       | S12    | S13                      |
| Sequenced and inferred<br>(as shown in Fig. 1) | $\pi$                                                      | 0.0049                   | 0.0059 | 0.0021 | 0.0018 | 0.0042         | 0.0010                    | 0.0032 | 0.0052 | 0.0001                    | 0.0035         | 0.0008                    | 0.0069 | 0.0091                   |
|                                                | Tajima's $D$                                               | 0.877                    | -0.835 | -1.182 | -0.417 | n.a.           | -1.418                    | n.a.   | n.a.   | <b>-1.886<sup>§</sup></b> | n.a.           | <b>-1.863<sup>§</sup></b> | 0.720  | 1.294                    |
|                                                | Fu and Li's $D^*$                                          | <b>1.410<sup>§</sup></b> | 0.875  | -2.283 | -1.677 | n.a.           | -2.442                    | n.a.   | n.a.   | <b>-3.124<sup>§</sup></b> | n.a.           | <b>-3.437<sup>§</sup></b> | 1.082  | <b>1.693<sup>§</sup></b> |
|                                                | Fu and Li's $F^*$                                          | 1.458                    | 0.353  | -2.266 | -1.490 | n.a.           | -2.486                    | n.a.   | n.a.   | <b>-3.206<sup>§</sup></b> | n.a.           | <b>-3.450<sup>§</sup></b> | 1.136  | <b>1.845<sup>§</sup></b> |
|                                                | # sites (excluding gaps)                                   | 1554                     | 760    | 1234   | 1827   | 1320           | 841                       | 1327   | 470    | 2189                      | 1336           | 1480                      | 1985   | 1622                     |
|                                                | # haplotypes                                               | 7                        | 6      | 10     | 13     | n.a.           | 6                         | n.a.   | 8      | 5                         | n.a.           | 10                        | 12     | 11                       |
|                                                | $N$                                                        | 30                       | 39     | 39     | 39     | 35             | 39                        | 34     | 37     | 35                        | 34             | 35                        | 39     | 36                       |
| Sequenced only                                 | $\pi$                                                      | 0.0048                   | 0.0077 | 0.0024 | 0.0019 | /              | 0.0010                    | /      | 0.0055 | 0.0002                    | /              | 0.0010                    | 0.0071 | 0.0093                   |
|                                                | Tajima's $D$                                               | 0.392                    | -0.466 | -1.110 | -0.491 | /              | -1.546                    | /      | n.a.   | <b>-1.978<sup>§</sup></b> | /              | <b>-1.901<sup>§</sup></b> | 0.676  | 1.076                    |
|                                                | Fu and Li's $D^*$                                          | 1.164                    | 0.943  | -1.981 | -1.430 | /              | <b>-2.870<sup>§</sup></b> | /      | n.a.   | <b>-2.716<sup>§</sup></b> | /              | <b>-3.404<sup>§</sup></b> | 1.090  | 0.905                    |
|                                                | Fu and Li's $F^*$                                          | 1.088                    | 0.596  | -2.003 | -1.331 | /              | <b>-2.882<sup>§</sup></b> | /      | n.a.   | <b>-2.864<sup>§</sup></b> | /              | <b>-3.443<sup>§</sup></b> | 1.126  | 1.128                    |
|                                                | # sites (excluding gaps)                                   | 1554                     | 760    | 1234   | 1827   | /              | 841                       | /      | 470    | 2189                      | /              | 1480                      | 1985   | 1622                     |
|                                                | # haplotypes                                               | 7                        | 6      | 10     | 13     | /              | 6                         | /      | 8      | 5                         | /              | 10                        | 12     | 11                       |
|                                                | $N$                                                        | 20                       | 24     | 30     | 30     | /              | 29                        | /      | 25     | 22                        | /              | 25                        | 33     | 26                       |
| No. of alleles<br>observed per genotype        | BAC                                                        | -                        | 1      | 1      | 1      | 1              | 1                         | 1      | 1      | 1                         | 1              | 1                         | 1      | -                        |
|                                                | 1.1                                                        | 2                        | 2      | 2      | 2      | 1              | 1                         | 2      | 2      | 2                         | 1              | 1                         | 2      | 1                        |
|                                                | 1.2                                                        | 1                        | 2      | 2      | 1      | 1              | 1                         | 2      | 1      | 1                         | 1              | 2                         | 2      | 2                        |
|                                                | 1.3                                                        | 1                        | 1      | 2      | 1      | 1              | 1                         | 2      | 1      | 2                         | 2              | 1                         | 2      | 2                        |
|                                                | 2.1                                                        | 1                        | 1      | 2      | 2      | 1 <sup>+</sup> | 2                         | 2      | 1      | 1                         | 1 <sup>+</sup> | 1                         | 2      | 2                        |
|                                                | 2.2                                                        | 2                        | 2      | 1      | 2      | 1              | 1                         | 1      | 1      | 1                         | 1              | 2                         | 2      | 2                        |
|                                                | 2.3                                                        | 1                        | 1      | 1      | 2      | 1              | 1                         | 1      | 1      | 1                         | 1              | 1                         | 1      | 1                        |
|                                                | 3.1                                                        | 1                        | 1      | 1      | 1      | 2              | 2                         | 2      | 1      | 1                         | 2              | 2                         | 2      | 2                        |
|                                                | 3.2                                                        | 1                        | 1      | 1      | 2      | 2              | 2                         | 2      | 1      | -                         | 2              | 2                         | 2      | 1                        |
|                                                | 4.1                                                        | 1                        | 1      | 2      | 2      | 2              | 2                         | 2      | 2      | 1                         | 2              | 2                         | 1      | 1                        |
|                                                | 5.1                                                        | 1                        | 1      | 2      | 2      | 2              | 2                         | 2      | 1      | 2                         | 2              | 1                         | 2      | 2                        |
|                                                | 5.2                                                        | 2                        | 1      | 2      | 1      | 2              | 1                         | 2      | 2      | 1                         | 2              | 1                         | 1      | 2                        |
|                                                | 5.3                                                        | 2                        | 1      | 2      | 1      | 2              | 2                         | 2      | 2      | 1                         | 2              | 1                         | 1      | 1                        |
|                                                | 6.1                                                        | 1                        | 1      | 1      | 2      | 2              | 1                         | 2      | 2      | 1                         | 1              | 1                         | 2      | 1                        |
|                                                | 6.2                                                        | 1                        | 1      | 1      | 1      | 1              | 2                         | 1      | 1      | 1                         | 1              | 2                         | 1      | -                        |
|                                                | 6.3                                                        | 2                        | 1      | 1      | 1      | 2              | 1                         | 2      | 1      | 1                         | 2              | 1                         | 2      | 1                        |
|                                                | 7.1                                                        | -                        | 1      | 1      | 1      | 2              | 1                         | 2      | 2      | 1                         | 1              | 1                         | 2      | 2                        |
|                                                | 7.2                                                        | -                        | 1      | 1      | 2      | 2              | 2                         | 2      | 1      | 2                         | 2              | 2                         | 1      | 1                        |
|                                                | 7.3                                                        | -                        | 2      | 2      | 1      | 2              | 1                         | 2      | 1      | -                         | 2              | -                         | 2      | 1                        |
|                                                | 8.1                                                        | -                        | 1      | 2      | 2      | 2              | 2                         | 1      | -      | 1                         | 1              | -                         | 2      | 1                        |
|                                                | <i>A. halleri</i> ssp. <i>gemmifera</i> (9.1) <sup>1</sup> | -                        | 1      | 2      | 2      | 1 <sup>+</sup> | 4*                        | 2      | 2      | 4*                        | 1 <sup>+</sup> | 2                         | 2      | 2                        |
|                                                | <i>A. lyrata</i> ssp. <i>lyrata</i> <sup>1</sup>           | 1                        | 1      | 1      | 1      | 1              | x                         | x      | x      | x                         | x              | 1                         | 1      | 1                        |

Values for BAC and *A. lyrata* are based on public data [8,39]. Genotypes for which only a single consensus sequence was obtained were concluded to be homozygous, and the second allele was inferred. Assignment to *HMA4* gene copy of S5, S7 and S10 was done by inference upon the assignment to S7 through anchoring *via* overlapping S8 sequences according to Materials and Methods (marked “/”; <sup>+</sup>: ambiguous assignment to S5 or S10). Grey shade: amplicons in triplicated region (*HMA4* and two downstream genes, see Figure 1). Red fonts: segments comprising repeated sequence stretches present in several, almost identical copies in the *HMA4* genomic region. n.a.: not applicable; sequences did not evolve independently because of ectopic gene conversion, thus precluding tests of molecular population genetics. <sup>§</sup>:  $P < 0.05$ . -: no PCR product obtained. x: not present in the genome. \*: Primer pairs designed to obtain S6 and S9 (see Table S1) both yielded the same set of four highly similar sequences (see Figure S1). <sup>1</sup>Parameters for the *A. halleri* ssp. *gemmifera* and *A. lyrata* ssp. *lyrata* individuals are only shown for comparison; their sequences were not included in the analyses presented above and in Figure 1.
