# Supplementary material for: Hard Selective Sweep and Ectopic Gene Conversion in a Gene Cluster Affording Environmental Adaptation
Source: PubMed Central journal article supplement (PMC3749932; doi:10.1371/journal.pgen.1003707), 2013-08-22
Supplement: pgen.1003707.s010.pdf [file pgen.1003707.s010.pdf]

**Table S3.** Identification within amplicons of repeated sequence stretches present in several copies in the *HMA4* genomic region.**A.** Sequence similarities between amplified segments and sequences within BAC contig of the *A. halleri* genomic *HMA4* region.

| Amplicon | Sequence identity (%) <sup>1</sup> | Hit length (bp) <sup>1</sup> | Coordinates in amplicon | Coordinates in <i>HMA4</i> BAC contig | Annotation                                         |
|----------|------------------------------------|------------------------------|-------------------------|---------------------------------------|----------------------------------------------------|
| S2       | 67                                 | 336                          | 1094-1413 r.c.          | 22145-22456                           | intergenic region At2g19050/At2g19060 <sup>2</sup> |
| S3       | -                                  | -                            | -                       | -                                     | -                                                  |
| S4       | 84                                 | 310                          | 4-298                   | 197971-198272                         | <i>AhHMA4-3<sub>p</sub></i>                        |
|          | 77                                 | 364                          | 1111-1471               | 146010-146336                         | <i>AhHMA4-2<sub>p</sub></i>                        |
| S5       | 99                                 | 1425                         | 1-1419                  | 208610-210034                         | <i>AhHMA4-3</i> 3'-end                             |
|          | 99                                 | 1419                         | 1-1419                  | 153021-154436                         | <i>AhHMA4-2</i> 3'-end                             |
| S6       | 88                                 | 753                          | 224-917                 | 200743-201470                         | <i>AhHMA4-3<sub>p</sub></i>                        |
|          | 77                                 | 364                          | 317-643                 | 64760-65120                           | <i>AhHMA4-1<sub>p</sub></i>                        |
| S7       | 99                                 | 1419                         | 1-1406                  | 71255-72673                           | <i>AhHMA4-1</i> 3'-end                             |
|          | 99                                 | 1407                         | 1-1394                  | 208610-210016                         | <i>AhHMA4-3</i> 3'-end                             |
| S8       | 95                                 | 2263                         | 1-2194                  | 209197-211416                         | intergenic region <i>AhHMA4-3</i> /At2g19120-3     |
|          | 90                                 | 2208                         | 1-2194                  | 71842-73865                           | intergenic region <i>AhHMA4-1</i> /At2g19120-1     |
| S9       | 80                                 | 2589                         | 43-2245                 | 144154-146630                         | <i>AhHMA4-2<sub>p</sub></i>                        |
|          | 77                                 | 313                          | 1714-1989               | 64809-65120                           | <i>AhHMA4-1<sub>p</sub></i>                        |
| S10      | 99                                 | 1407                         | 1-1407                  | 71255-72661                           | <i>AhHMA4-1</i> 3'-end                             |
|          | 99                                 | 1407                         | 1-1407                  | 153021-154414                         | <i>AhHMA4-2</i> 3'-end                             |
| S11      | 76                                 | 103                          | 133-234                 | 61738-61639                           | <i>AhHMA4-1<sub>p</sub></i>                        |
| S12      | 77                                 | 71                           | 410-480                 | 167443-167509                         | intergenic region At2g19120-2(c)/ <i>AhHMA4-3</i>  |

<sup>1</sup>Sequence identities and hit lengths are given for the top-scoring non-self hits running amplicon sequences (predicted based on BAC contig) as queries against the *HMA4* BAC contig in BLASTN with default settings at NCBI (Genbank accession numbers EU382073.1 and EU382072.1; contig length 289,768 bp [8]).

<sup>2</sup>All three genes (At2g19010/S2, At2g19050 and At2g19060) encode putative GDSL-motif lipase/hydrolase family proteins.

Note that sequences corresponding to S1 and S13 are not present in the *HMA4* BAC contig. Red fonts: segments comprising repeated sequence stretches present in several, almost identical copies in the genomic *HMA4* region. r.c.: reverse complement. -: no significant hit.

**B. Sequence similarities between amplified segments of *A. halleri* and sequences in the *A. thaliana* and *A. lyrata* ssp. *lyrata* genomes.**

| <b>Top hits</b>    |                                    | <i>A. thaliana</i>           |                                                          |                                    | <i>A. lyrata</i>             |                                                       |  |
|--------------------|------------------------------------|------------------------------|----------------------------------------------------------|------------------------------------|------------------------------|-------------------------------------------------------|--|
| Loci               | Sequence identity (%) <sup>1</sup> | Hit length (nt) <sup>1</sup> | Annotation                                               | Sequence identity (%) <sup>1</sup> | Hit length (nt) <sup>1</sup> | Annotation                                            |  |
| S1                 | 92                                 | 328                          | At2g19750                                                | 96                                 | 149                          | GENE ID: 9322332 ARALYDRAFT_900373                    |  |
| S2                 | 96                                 | 217                          | At2g19010                                                | 99                                 | 217                          | GENE ID: 9305466 ARALYDRAFT_491739                    |  |
| S3                 | 92                                 | 546                          | At2g19090                                                | 94                                 | 540                          | GENE ID: 9322308 ARALYDRAFT_480823                    |  |
| S4                 | 91                                 | 64                           | 5'-UTR of <i>AtHMA4</i>                                  | 97                                 | 33                           | GENE ID: 9322307 ARALYDRAFT_480822 <sup>2</sup>       |  |
| <b>S5</b>          | <b>92</b>                          | <b>690</b>                   | <b><i>AtHMA4</i></b>                                     | <b>95</b>                          | <b>692</b>                   | <b>GENE ID: 9322307 ARALYDRAFT_480822<sup>2</sup></b> |  |
|                    |                                    |                              |                                                          | <b>95</b>                          | <b>692</b>                   | <b>GENE ID: 9330132 ARALYDRAFT_473917<sup>3</sup></b> |  |
| S6                 | 79                                 | 186                          | BAC t20k24 (in <i>AtHMA4</i> promoter)                   | 85                                 | 197                          | <i>Arabidopsis lyrata</i> clone JGIFAFI-61E14         |  |
| <b>S7</b>          | <b>92</b>                          | <b>690</b>                   | <b><i>AtHMA4</i></b>                                     | <b>95</b>                          | <b>692</b>                   | <b>GENE ID: 9322307 ARALYDRAFT_480822<sup>2</sup></b> |  |
|                    |                                    |                              |                                                          | <b>95</b>                          | <b>692</b>                   | <b>GENE ID: 9330132 ARALYDRAFT_473917<sup>3</sup></b> |  |
| <b>S8</b>          | <b>96</b>                          | <b>632</b>                   | <b><i>At2g19120</i></b>                                  | -                                  | -                            | -                                                     |  |
| S9                 | 71                                 | 295                          | BAC t20k24 (in <i>AtHMA4</i> promoter)                   | 82                                 | 95                           | GENE ID: 9307927 ARALYDRAFT_909928                    |  |
| <b>S10</b>         | <b>92</b>                          | <b>690</b>                   | <b><i>AtHMA4</i></b>                                     | <b>95</b>                          | <b>692</b>                   | <b>GENE ID: 9322307 ARALYDRAFT_480822<sup>2</sup></b> |  |
|                    |                                    |                              |                                                          | <b>95</b>                          | <b>692</b>                   | <b>GENE ID: 9330132 ARALYDRAFT_473917<sup>3</sup></b> |  |
| S11                | 92                                 | 235                          | At2g19150                                                | 98                                 | 236                          | GENE ID: 9322304 ARALYDRAFT_480819                    |  |
| S12                | 92                                 | 450                          | At2g19160                                                | 90                                 | 454                          | GENE ID: 9320242 ARALYDRAFT_480818                    |  |
| S13                | 96                                 | 222                          | At2g19490                                                | 83                                 | 289                          | GENE ID: 9320055 ARALYDRAFT_480524                    |  |
| <b>Second hits</b> |                                    | <i>A. thaliana</i>           |                                                          |                                    | <i>A. lyrata</i>             |                                                       |  |
| Loci               | Sequence identity (%) <sup>1</sup> | Hit length (nt) <sup>1</sup> | Annotation                                               | Sequence identity (%) <sup>1</sup> | Hit length (nt) <sup>1</sup> | Annotation                                            |  |
| S1                 | 89                                 | 162                          | At2g19740                                                | 75                                 | 226                          | Flowering locus T promoter (FN813300.1)               |  |
| S2                 | 72                                 | 186                          | At2g19060                                                | 71                                 | 211                          | GDSSL-motif lipase/hydrolase family protein           |  |
|                    | < 80                               | variable                     | multiple hits <sup>4</sup>                               |                                    |                              |                                                       |  |
| S3                 | 84                                 | 224                          | At4g30130 (segmental duplication)                        | 73                                 | 102                          | GENE ID: 9305000 ARALYDRAFT_656131                    |  |
| S4                 | -                                  | -                            | -                                                        | -                                  | -                            | -                                                     |  |
| <b>S5</b>          | <b>70</b>                          | <b>207</b>                   | <b><i>At4g30110 - AtHMA2</i> (segmental duplication)</b> | <b>70</b>                          | <b>207</b>                   | <b>GENE ID: 9303439 ARALYDRAFT_657042</b>             |  |
| S6                 | -                                  | -                            | -                                                        | -                                  | -                            | -                                                     |  |
| <b>S7</b>          |                                    | <b>207</b>                   | <b><i>At4g30110 - AtHMA2</i> (segmental duplication)</b> | <b>70</b>                          | <b>207</b>                   | <b>GENE ID: 9303439 ARALYDRAFT_657042</b>             |  |
| <b>S8</b>          | <b>86</b>                          | <b>556</b>                   | <b><i>At4g30100</i> (segmental duplication)</b>          | -                                  | -                            | -                                                     |  |
| S9                 | -                                  | -                            | -                                                        | -                                  | -                            | -                                                     |  |
| <b>S10</b>         |                                    | <b>207</b>                   | <b><i>At4g30110 - AtHMA2</i> (segmental duplication)</b> | <b>70</b>                          | <b>207</b>                   | <b>GENE ID: 9303439 ARALYDRAFT_657042</b>             |  |
| S11                | 76                                 | 158                          | At2g47280                                                | -                                  | -                            | -                                                     |  |
| S12                | 77                                 | 339                          | At4g30060 (segmental duplication)                        | 76                                 | 366                          | GENE ID: 9305472 ARALYDRAFT_491750                    |  |
| S13                | 86                                 | 327                          | At2g19480                                                | 88                                 | 41                           | GENE ID: 9328930 ARALYDRAFT_471744                    |  |

<sup>1</sup>Sequence identities and hit lengths are given for the two top-scoring hits from BLASTN with default settings using amplicon sequences as queries against all *A. thaliana* and *A. lyrata* ssp. *lyrata* sequences at NCBI.

<sup>2</sup>*AtHMA4*.

<sup>3</sup>Truncated pseudogene copy of *HMA4* present only in *A. lyrata* and corresponding to the 3'-end of *HMA4* (see Figure S1).

<sup>4</sup>Part of the At2g19010/At19020 intergenic region of the *A. halleri* S2 sequences contains repeats found at multiple sites on multiple chromosomes of *A. thaliana*.

Red fonts: segments comprising repeated sequence stretches present in several, almost identical copies in the *HMA4* genomic region of *A. halleri*. r.c.: reverse complement.-: no significant hit.
