# Supplementary material for: Hard Selective Sweep and Ectopic Gene Conversion in a Gene Cluster Affording Environmental Adaptation
Source: PubMed Central journal article supplement (PMC3749932; doi:10.1371/journal.pgen.1003707), 2013-08-22
Supplement: pgen.1003707.s011.pdf [file pgen.1003707.s011.pdf]

**Table S4.** Robustness of  $\pi$  estimation.**A.** Estimation of error in  $\pi$  resulting from uncertainties in the assignment of sequences to *HMA4* gene copy (for S5, S7 and S10).

| Locus                      | Genotypes                                    |              |        |                |              |        |                   |              |        |
|----------------------------|----------------------------------------------|--------------|--------|----------------|--------------|--------|-------------------|--------------|--------|
|                            | All <i>A. halleri</i><br>ssp. <i>halleri</i> |              |        | Harz Mountains |              |        | Thuringian Forest |              |        |
|                            | <i>N</i>                                     | No. of sites | $\pi$  | <i>N</i>       | No. of sites | $\pi$  | <i>N</i>          | No. of sites | $\pi$  |
| S5 only ( <i>HMA4-1</i> )  | 35                                           | 1320         | 0.0042 | 22             | 1320         | 0.0042 | 11                | 1336         | 0.0025 |
| S5 + ambiguous S5/S10      | 40                                           | 1320         | 0.0043 | 25             | 1320         | 0.0042 | 13                | 1336         | 0.0033 |
| S7 anchored based on S8    | 34                                           | 1327         | 0.0032 | 22             | 1327         | 0.0032 | 10                | 1327         | 0.0020 |
| S7 only ( <i>HMA4-2</i> )  | 37                                           | 1327         | 0.0031 | 23             | 1327         | 0.0033 | 12                | 1327         | 0.0019 |
| S7 + ambiguous S7/S10      | 39                                           | 1327         | 0.0032 | 25             | 1327         | 0.0033 | 12                | 1327         | 0.0019 |
| S10 only ( <i>HMA4-3</i> ) | 34                                           | 1336         | 0.0035 | 21             | 1336         | 0.0039 | 11                | 1349         | 0.0035 |
| S10 + ambiguous S5/S10     | 41                                           | 1320         | 0.0036 | 26             | 1320         | 0.0039 | 13                | 1349         | 0.0036 |

No. of sites are numbers of informative sites, excluding those with gaps. Sequences that could not be assigned to a single *HMA4* gene copy are named ambiguous (see Figure 4, Figure S4).

**B.** Dependence of  $\pi$  on variation in sampling.

| Genotypes                                 | Segment |        |        |        |        |        |        |        |        |        |        |        |        |
|-------------------------------------------|---------|--------|--------|--------|--------|--------|--------|--------|--------|--------|--------|--------|--------|
|                                           | S1      | S2     | S3     | S4     | S5     | S6     | S7     | S8     | S9     | S10    | S11    | S12    | S13    |
| All <i>A. halleri</i> ssp. <i>halleri</i> | 0.0049  | 0.0059 | 0.0021 | 0.0018 | 0.0042 | 0.0010 | 0.0032 | 0.0052 | 0.0001 | 0.0035 | 0.0008 | 0.0069 | 0.0091 |
| Harz Mountains                            | 0.0033  | 0.0063 | 0.0026 | 0.0023 | 0.0042 | 0.0006 | 0.0032 | 0.0034 | 0.0001 | 0.0039 | 0.0007 | 0.0068 | 0.0098 |
| Thuringian Forest                         | 0.0012  | 0.0066 | 0.0004 | 0.0003 | 0.0025 | 0.0011 | 0.0020 | 0.0062 | 0.0001 | 0.0035 | 0.0005 | 0.0057 | 0.0061 |

Grey shade: amplicons in triplicated region (*HMA4* and two downstream genes, see Figure 1). Red fonts: segments comprising repeated sequence stretches present in several, almost identical copies in the *HMA4* genomic region.
