# Supplementary material for: Hard Selective Sweep and Ectopic Gene Conversion in a Gene Cluster Affording Environmental Adaptation
Source: PubMed Central journal article supplement (PMC3749932; doi:10.1371/journal.pgen.1003707), 2013-08-22
Supplement: pgen.1003707.s012.pdf [file pgen.1003707.s012.pdf]

**Table S5.** Analyses of Molecular Variance (AMOVA) in *A. halleri*.

A. Collection sites were assigned to three geographic regions (referred to as groups): Harz Mountains (*A. halleri* ssp. *halleri*: 1 to 5; see Table 1), Thuringian Forest (*A. halleri* ssp. *halleri*: 6, 7), and Japan (*A. halleri* ssp. *gemmifera*: 9).

| Segment         | Source of variation         | <i>df</i> | Sum of squares | Variance components | Percentage of variation | Fixation Indices | <i>P</i> value                                  |
|-----------------|-----------------------------|-----------|----------------|---------------------|-------------------------|------------------|-------------------------------------------------|
| S1              | Between groups              | 1         | 44.8           | 3.76                | 57.1                    | $F_{CT}$ : 0.57  | 0.1515 ( $\pm$ 0.0137)                          |
|                 | Between sites within groups | 4         | 29.1           | 1.21                | 18.4                    | $F_{SC}$ : 0.43  | 0.0049 ( $\pm$ 0.0020)                          |
|                 | Within sites                | 24        | 38.8           | 1.62                | 24.5                    | $F_{ST}$ : 0.75  | $< 5 \cdot 10^{-6}$ ( $\pm < 5 \cdot 10^{-6}$ ) |
|                 | Total                       | 29        | 112.8          | 6.59                |                         |                  |                                                 |
| S2              | Between groups              | 2         | 26.0           | 0.77                | 22.0                    | $F_{CT}$ : 0.22  | 0.1652 ( $\pm$ 0.0126)                          |
|                 | Between sites within groups | 5         | 33.2           | 0.99                | 28.3                    | $F_{SC}$ : 0.36  | 0.0059 ( $\pm$ 0.0022)                          |
|                 | Within sites                | 30        | 52.2           | 1.74                | 49.7                    | $F_{ST}$ : 0.50  | $< 5 \cdot 10^{-6}$ ( $\pm < 5 \cdot 10^{-6}$ ) |
|                 | Total                       | 37        | 111.3          | 3.50                |                         |                  |                                                 |
| S3              | Between groups              | 2         | 10.3           | 0.35                | 21.4                    | $F_{CT}$ : 0.21  | 0.0254 ( $\pm$ 0.0040)                          |
|                 | Between sites within groups | 5         | 10.2           | 0.19                | 11.7                    | $F_{SC}$ : 0.15  | 0.1241 ( $\pm$ 0.0128)                          |
|                 | Within sites                | 30        | 32.7           | 1.09                | 66.8                    | $F_{ST}$ : 0.33  | $< 5 \cdot 10^{-6}$ ( $\pm < 5 \cdot 10^{-6}$ ) |
|                 | Total                       | 37        | 53.2           | 1.63                |                         |                  |                                                 |
| S4              | Between groups              | 2         | 17.4           | 0.69                | 30.6                    | $F_{CT}$ : 0.31  | 0.0078 ( $\pm$ 0.0031)                          |
|                 | Between sites within groups | 5         | 11.9           | 0.21                | 9.4                     | $F_{SC}$ : 0.14  | 0.2033 ( $\pm$ 0.0153)                          |
|                 | Within sites                | 30        | 40.2           | 1.34                | 59.9                    | $F_{ST}$ : 0.40  | 0.0010 ( $\pm$ 0.0010)                          |
|                 | Total                       | 37        | 69.6           | 2.24                |                         |                  |                                                 |
| S6 <sup>a</sup> | Between groups              | 1         | 2.4            | 0.12                | 25.2                    | $F_{CT}$ : 0.25  | 0.1134 ( $\pm$ 0.0098)                          |
|                 | Between sites within groups | 5         | 2.7            | 0.05                | 10.3                    | $F_{SC}$ : 0.14  | 0.0635 ( $\pm$ 0.0065)                          |
|                 | Within sites                | 29        | 8.7            | 0.30                | 64.5                    | $F_{ST}$ : 0.35  | 0.0020 ( $\pm$ 0.0014)                          |
|                 | Total                       | 35        | 13.8           | 0.46                |                         |                  |                                                 |
| S9 <sup>a</sup> | Between groups              | 1         | 0.1            | 0.00                | 0.8                     | $F_{CT}$ : 0.01  | 0.6188 ( $\pm$ 0.0151)                          |
|                 | Between sites within groups | 5         | 0.5            | -0.07               | -5.1                    | $F_{SC}$ : -0.05 | 0.6901 ( $\pm$ 0.0084)                          |
|                 | Within sites                | 25        | 3.2            | 0.13                | 104.2                   | $F_{ST}$ : -0.04 | 0.6843 ( $\pm$ 0.0154)                          |
|                 | Total                       | 31        | 3.9            | 0.12                |                         |                  |                                                 |
| S11             | Between groups              | 2         | 8.8            | 0.44                | 44.6                    | $F_{CT}$ : 0.45  | 0.0049 ( $\pm$ 0.0020)                          |
|                 | Between sites within groups | 5         | 3.5            | 0.04                | 4.2                     | $F_{SC}$ : 0.08  | 0.0841 ( $\pm$ 0.0082)                          |
|                 | Within sites                | 28        | 14.1           | 0.50                | 51.2                    | $F_{ST}$ : 0.49  | $< 5 \cdot 10^{-6}$ ( $\pm < 5 \cdot 10^{-6}$ ) |
|                 | Total                       | 35        | 26.4           | 0.98                |                         |                  |                                                 |
| S12             | Between groups              | 2         | 45.0           | 1.23                | 15.3                    | $F_{CT}$ : 0.14  | 0.0860 ( $\pm$ 0.0077)                          |
|                 | Between sites within groups | 5         | 60.2           | 1.33                | 16.5                    | $F_{SC}$ : 0.20  | 0.0293 ( $\pm$ 0.0048)                          |
|                 | Within sites                | 30        | 164.7          | 5.49                | 68.2                    | $F_{ST}$ : 0.31  | $< 5 \cdot 10^{-6}$ ( $\pm < 5 \cdot 10^{-6}$ ) |
|                 | Total                       | 37        | 270.0          | 8.06                |                         |                  |                                                 |
| S13             | Between groups              | 2         | 40.8           | 0.74                | 8.6                     | $F_{CT}$ : 0.09  | 0.2248 ( $\pm$ 0.0104)                          |
|                 | Between sites within groups | 5         | 81.9           | 2.32                | 27.2                    | $F_{SC}$ : 0.30  | 0.0078 ( $\pm$ 0.0034)                          |
|                 | Within sites                | 28        | 153.2          | 5.47                | 64.1                    | $F_{ST}$ : 0.36  | $< 5 \cdot 10^{-6}$ ( $\pm < 5 \cdot 10^{-6}$ ) |
|                 | Total                       | 35        | 275.9          | 8.53                |                         |                  |                                                 |

**B.** Collection sites were assigned to four geographic regions (referred to as groups): Groups were as in (a) above, and additionally including France as a fourth region (group) represented by Auby (*A. halleri* ssp. *halleri*: 8; see Table 1).

| Segment         | Source of variation         | <i>df</i> | Sum of squares | Variance components | Percentage of variation | Fixation Indices | <i>P</i> value                                  |
|-----------------|-----------------------------|-----------|----------------|---------------------|-------------------------|------------------|-------------------------------------------------|
| S1              | Between groups              | n.a.      | n.a.           | n.a.                | n.a.                    | n.a.             | n.a.                                            |
|                 | Between sites within groups | n.a.      | n.a.           | n.a.                | n.a.                    | n.a.             | n.a.                                            |
|                 | Within sites                | n.a.      | n.a.           | n.a.                | n.a.                    | n.a.             | n.a.                                            |
|                 | Total                       | n.a.      | n.a.           | n.a.                | n.a.                    | n.a.             | n.a.                                            |
| S2              | Between groups              | 3         | 26.9           | 0.53                | 16.6                    | $F_{CT}$ : 0.17  | 0.2493 ( $\pm$ 0.0132)                          |
|                 | Between sites within groups | 5         | 33.2           | 1.00                | 31.5                    | $F_{SC}$ : 0.37  | 0.0059 ( $\pm$ 0.0022)                          |
|                 | Within sites                | 31        | 52.2           | 1.68                | 52.3                    | $F_{ST}$ : 0.48  | 0.0010 ( $\pm$ 0.0010)                          |
|                 | Total                       | 39        | 112.2          | 3.22                |                         |                  |                                                 |
| S3              | Between groups              | 3         | 10.8           | 0.25                | 16.5                    | $F_{CT}$ : 0.16  | 0.0616 ( $\pm$ 0.0072)                          |
|                 | Between sites within groups | 5         | 10.2           | 0.19                | 11.9                    | $F_{SC}$ : 0.14  | 0.1241 ( $\pm$ 0.0117)                          |
|                 | Within sites                | 31        | 34.7           | 1.12                | 71.5                    | $F_{ST}$ : 0.28  | 0.0039 ( $\pm$ 0.0018)                          |
|                 | Total                       | 39        | 55.6           | 1.56                |                         |                  |                                                 |
| S4              | Between groups              | 3         | 18.4           | 0.56                | 26.3                    | $F_{CT}$ : 0.27  | 0.0371 ( $\pm$ 0.0057)                          |
|                 | Between sites within groups | 5         | 11.9           | 0.21                | 10.3                    | $F_{SC}$ : 0.14  | 0.2014 ( $\pm$ 0.0125)                          |
|                 | Within sites                | 31        | 41.2           | 1.33                | 63.4                    | $F_{ST}$ : 0.37  | 0.0078 ( $\pm$ 0.0034)                          |
|                 | Total                       | 39        | 71.6           | 2.11                |                         |                  |                                                 |
| S6 <sup>a</sup> | Between groups              | 3         | 50.0           | 1.99                | 81.3                    | $F_{CT}$ : 0.81  | 0.0371 ( $\pm$ 0.0048)                          |
|                 | Between sites within groups | 5         | 2.7            | 0.02                | 0.8                     | $F_{SC}$ : 0.04  | 0.0743 ( $\pm$ 0.0069)                          |
|                 | Within sites                | 33        | 14.7           | 0.44                | 17.9                    | $F_{ST}$ : 0.82  | $< 5 \cdot 10^{-6}$ ( $\pm < 5 \cdot 10^{-6}$ ) |
|                 | Total                       | 41        | 67.1           | 2.44                |                         |                  |                                                 |
| S9 <sup>a</sup> | Between groups              | 3         | 84.0           | 3.77                | 82.9                    | $F_{CT}$ : 0.83  | 0.0987 ( $\pm$ 0.0110)                          |
|                 | Between sites within groups | 5         | 0.5            | -0.20               | -4.5                    | $F_{SC}$ : -0.26 | 0.7077 ( $\pm$ 0.0157)                          |
|                 | Within sites                | 29        | 28.5           | 0.98                | 21.6                    | $F_{ST}$ : 0.78  | $< 5 \cdot 10^{-6}$ ( $\pm < 5 \cdot 10^{-6}$ ) |
|                 | Total                       | 37        | 113.0          | 4.55                |                         |                  |                                                 |
| S11             | Between groups              | n.a.      | n.a.           | n.a.                | n.a.                    | n.a.             | n.a.                                            |
|                 | Between sites within groups | n.a.      | n.a.           | n.a.                | n.a.                    | n.a.             | n.a.                                            |
|                 | Within sites                | n.a.      | n.a.           | n.a.                | n.a.                    | n.a.             | n.a.                                            |
|                 | Total                       | n.a.      | n.a.           | n.a.                | n.a.                    | n.a.             | n.a.                                            |
| S12             | Between groups              | 3         | 59.8           | 1.37                | 16.8                    | $F_{CT}$ : 0.17  | 0.0753 ( $\pm$ 0.0081)                          |
|                 | Between sites within groups | 5         | 60.2           | 1.34                | 16.5                    | $F_{SC}$ : 0.20  | 0.0283 ( $\pm$ 0.0059)                          |
|                 | Within sites                | 31        | 168.2          | 5.42                | 66.7                    | $F_{ST}$ : 0.33  | $< 5 \cdot 10^{-6}$ ( $\pm < 5 \cdot 10^{-6}$ ) |
|                 | Total                       | 39        | 288.3          | 8.14                |                         |                  |                                                 |
| S13             | Between groups              | 3         | 50.6           | 0.60                | 7.3                     | $F_{CT}$ : 0.07  | 0.2698 ( $\pm$ 0.0169)                          |
|                 | Between sites within groups | 5         | 81.9           | 2.36                | 28.6                    | $F_{SC}$ : 0.31  | 0.0039 ( $\pm$ 0.0018)                          |
|                 | Within sites                | 29        | 153.2          | 5.28                | 64.0                    | $F_{ST}$ : 0.36  | $< 5 \cdot 10^{-6}$ ( $\pm < 5 \cdot 10^{-6}$ ) |
|                 | Total                       | 37        | 285.7          | 8.25                |                         |                  |                                                 |

<sup>a</sup>excluding *A. halleri* ssp. *gemmifera*. n.a.: not applicable (data for S1 and S11 are missing for the individual from Auby; see Table S1)
