# Supplementary material for: Hard Selective Sweep and Ectopic Gene Conversion in a Gene Cluster Affording Environmental Adaptation
Source: PubMed Central journal article supplement (PMC3749932; doi:10.1371/journal.pgen.1003707), 2013-08-22
Supplement: pgen.1003707.s013.pdf [file pgen.1003707.s013.pdf]

**Table S6.** Sequences and reaction efficiencies of primer pairs used for quantitative PCR determination of genomic copy number.

| Amplicon       |         | Species                  |                                     |                            | Primer efficiency <sup>†</sup> |
|----------------|---------|--------------------------|-------------------------------------|----------------------------|--------------------------------|
|                |         | <i>A. halleri</i>        | <i>A. lyrata</i> ssp. <i>lyrata</i> | <i>A. thaliana</i> (Col-0) |                                |
| <i>HMA4</i>    | Forward | GCTGCAGCGATGAAAAACAAAC   | GCTGCAACGATGAAAAGCAAAC              | GCTGCAGCGATGAAAAACAAAC     | 1.91 ± 0.01<br><i>n</i> = 290  |
|                | Reverse | TCCATACAACATCCCGAGGAAC   | TCCATACAACATCCCGAGGAAC              | TTCACACAACATCCCGAGGAGC     |                                |
| <i>FRD3 5'</i> | Forward | TGGCAGAGGAAGACACGATG     | TGGCAGAGGAAGACACGATG                | TGGCAGAGGAAGACACGATG       | 1.91 ± 0.01<br><i>n</i> = 276  |
|                | Reverse | TGGCTTTGTTTCGCTTCTTCTTT  | TGGCTTTGTTTCGCTTCTTCTTT             | TGGCTTTGTTTCGCTTCTTCTTT    |                                |
| <i>FRD3 3'</i> | Forward | TTTATAGCAGCCACGCAGCC     | TTTATAGCAGCCACGCAACC                | TTTATAGCAGCAACGCAGCC       | 1.89 ± 0.01<br><i>n</i> = 294  |
|                | Reverse | TCCATCCAATACAAAGGCGAGT   | TCCATCCAATACAAAGGCGAGT              | TCCATCCAATACAAAGGCGAGA     |                                |
| S13            | Forward | ACTTCTGGGTAGTTGGAATTTTCC | ACTTCTGGGTAGTTGGAATTTTCC            | ACTTCTGGGTAGTTGGAATTTTCC   | 1.89 ± 0.01<br><i>n</i> = 276  |
|                | Reverse | CGTTTCGGAGAATCCTCGC      | CGTTTCGGAGAATCCTCGC                 | CGTTTCGGAGAATCCTCGC        |                                |

All primer sequences are given in 5'- to 3'-direction. The *HMA4* and S13 primers for *A. halleri* were designed based on an alignment of all S5/S7/S10 and S13 consensus sequences (see Figure 1, Table S1), respectively, in order to ensure the absence of polymorphisms within primer binding sites. The *FRD3* primers for *A. halleri* were designed based on available sequences from the Lan3.1 individual of the Langelshheim population [12]. The *A. thaliana* and *A. lyrata* ssp. *lyrata* primers were designed based on available genome sequences [39,73].

<sup>†</sup>: arithmetic mean ± s. e. m., *n* equals the number of replicate PCR reactions per amplicon.
